# Supplementary material for: The Novel Long Noncoding RNA linc00467 Promotes Cell Survival but Is Down-Regulated by N-Myc
Source: PubMed Central journal article supplement (PMC3929584; doi:10.1371/journal.pone.0088112), 2014-02-19

# Supporting Information Figure S1

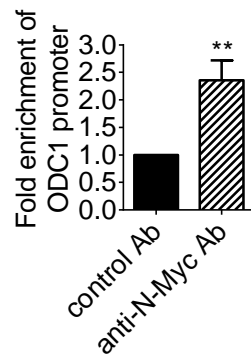

Supplement: pone.0088112.s001.pdf [file pone.0088112.s001.pdf]
